# Supplementary material
Source: PubMed Central journal article supplement (PMC2786944)

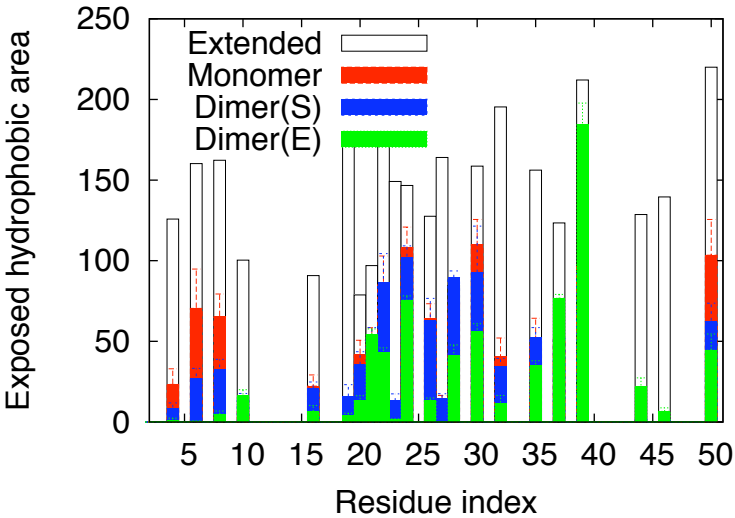

Supplement: 0708411105_1.pdf [file 0708411105_1.pdf]
